# Supplementary material for: Intermolecular dynamics of NH3-rare gas complexes in the ν2 umbrella region of NH3 investigated by rovibrational laser jet-cooled spectroscopy and ab initio calculations
Source: Royal Society of Chemistry journal article supplement (doi:10.1039/d1cp00316j), 2021-01-01
Supplement: d1cp00316j1.pdf [file d1cp00316j1.pdf]

**Intermolecular dynamics of NH<sub>3</sub>-rare gas complexes  
in the  $\nu_2$  umbrella region of NH<sub>3</sub> investigated by  
rovibrational laser jet-cooled spectroscopy and *ab initio* calculations**

Y. Belkhodja, J. Loreau, A. van der Avoird, Y. Berger and P. Asselin

**Supplementary material**

Table S1: List of observed and *ab initio* frequencies (cm<sup>-1</sup>) of both  $\Pi_{e/f}(j=1, k=0) \leftarrow \Sigma_f(j=1, k=0)$  and  $\Sigma_f(j=1, k=0) \leftarrow \Sigma_f(j=0, k=0)$  transitions for the four ortho NH<sub>3</sub>-Rg complexes. The experimental frequency values in bold are derived from the spectral simulations.

| Transition | NH <sub>3</sub> -Ne                                 |                  | NH <sub>3</sub> -Ar |                  | NH <sub>3</sub> -Kr |                  | NH <sub>3</sub> -Xe |                  |
|------------|-----------------------------------------------------|------------------|---------------------|------------------|---------------------|------------------|---------------------|------------------|
|            | Exp                                                 | <i>Ab initio</i> | Exp                 | <i>Ab initio</i> | Exp                 | <i>Ab initio</i> | Exp                 | <i>Ab initio</i> |
|            | $\Pi_{e/f}(j=1, k=0) \leftarrow \Sigma_f(j=1, k=0)$ |                  |                     |                  |                     |                  |                     |                  |
| P(2)       | 949.71                                              | 949.989          | 949.998             | 949.949          | 951.241             | 950.778          | 954.069             | 952.694          |
| P(3)       | 949.414                                             | 949.694          | 949.793             | 949.747          | 951.076             | 950.615          | <b>953.919</b>      | 952.551          |
| P(4)       | 949.104                                             | 949.385          | 949.583             | 949.54           | 950.905             | 950.448          | <b>953.762</b>      | 952.401          |
| P(5)       | 948.78                                              | 949.062          | 949.366             | 949.328          | 950.729             | 950.277          | <b>953.595</b>      | 952.246          |
| P(6)       | 948.443                                             | 948.729          | 949.144             | 949.11           | 950.548             | 950.1            | <b>953.422</b>      | 952.086          |
| P(7)       | 948.096                                             | 948.382          | 948.916             | 948.888          | 950.362             | 949.92           | <b>953.241</b>      | 951.921          |
| P(8)       | -                                                   | 948.027          | 948.682             | 948.66           | 950.171             | 949.735          | <b>953.053</b>      | 951.75           |
| P(9)       | -                                                   | -                | 948.443             | -                | 949.976             | -                | -                   | -                |
| P(10)      | -                                                   | -                | 948.199             | -                | 949.776             | -                | -                   | -                |
| P(11)      | -                                                   | -                | 947.95              | -                | 949.571             | -                | -                   | -                |
| P(12)      | -                                                   | -                | 947.696             | -                | 949.362             | -                | -                   | -                |
| P(13)      | -                                                   | -                | 947.437             | -                | 949.149             | -                | -                   | -                |
| P(14)      | -                                                   | -                | 947.175             | -                | 948.932             | -                | -                   | -                |
| P(15)      | -                                                   | -                | -                   | -                | 948.711             | -                | -                   | -                |
| Q(1)       | 950.257                                             | 950.537          | <b>950.388</b>      | 950.336          | 951.555             | 951.089          | 954.346             | 952.964          |
| Q(2)       | 950.262                                             | 950.542          | <b>950.387</b>      | 950.336          | 951.553             | 951.087          | 954.343             | 952.961          |
| Q(3)       | 950.27                                              | 950.55           | 950.386             | 950.336          | 951.551             | 951.086          | 954.337             | 952.957          |
| Q(4)       | 950.28                                              | 950.561          | 950.385             | 950.336          | 951.547             | 951.083          | 954.331             | 952.952          |
| Q(5)       | 950.293                                             | 950.574          | 950.384             | 950.337          | 951.542             | 951.08           | 954.322             | 952.946          |
| Q(6)       | 950.308                                             | 950.591          | 950.382             | 950.337          | 951.536             | 951.077          | 954.311             | 952.939          |
| Q(7)       | 950.327                                             | 950.61           | 950.38              | 950.339          | 951.53              | 951.073          | 954.299             | 952.93           |
| Q(8)       | 950.349                                             | 950.634          | 950.378             | 950.339          | 951.523             | 951.068          | 954.285             | 952.92           |
| Q(9)       | 950.374                                             | -                | 950.376             | -                | 951.514             | -                | 954.269             | -                |
| Q(10)      | 950.404                                             | -                | 950.373             | -                | 951.505             | -                | 954.252             | -                |
| Q(11)      | 950.437                                             | -                | 950.371             | -                | 951.495             | -                | 954.233             | -                |
| Q(12)      | 950.475                                             | -                | 950.368             | -                | 951.484             | -                | 954.212             | -                |
| Q(13)      | 950.518                                             | -                | 950.366             | -                | 951.472             | -                | 954.19              | -                |
| Q(14)      | 950.623                                             | -                | 950.363             | -                | 951.46              | -                | 954.165             | -                |
| Q(15)      | 950.257                                             | -                | 950.361             | -                | 951.447             | -                | 954.139             | -                |
| Q(16)      | -                                                   | -                | 950.359             | -                | 951.432             | -                | 954.112             | -                |
| Q(17)      | -                                                   | -                | 950.357             | -                | 951.418             | -                | 954.083             | -                |

|       |                |         |         |         |         |         |         |         |
|-------|----------------|---------|---------|---------|---------|---------|---------|---------|
| Q(18) | -              | -       | 950.355 | -       | 951.402 | -       | 954.052 | -       |
| Q(19) | -              | -       | 950.354 | -       | 951.386 | -       | 954.019 | -       |
| Q(20) | -              | -       | 950.353 | -       | 951.369 | -       | 953.984 | -       |
| Q(21) | -              | -       | 950.353 | -       | 951.352 | -       | 953.948 | -       |
| Q(22) | -              | -       | -       | -       | 951.334 | -       | 953.911 | -       |
| Q(23) | -              | -       | -       | -       | 951.315 | -       | 953.872 | -       |
| Q(24) | -              | -       | -       | -       | 951.296 | -       | 953.831 | -       |
| Q(25) | -              | -       | -       | -       | 951.277 | -       | 955.519 | -       |
| Q(26) | -              | -       | -       | -       | 951.238 | -       | -       | -       |
| Q(27) | -              | -       | -       | -       | 951.217 | -       | -       | -       |
| Q(28) | -              | -       | -       | -       | 951.555 | -       | -       | -       |
| R(0)  | 950.503        | 950.783 | 950.573 | 950.521 | 951.706 | 951.238 | 954.476 | 953.092 |
| R(1)  | 950.734        | 951.015 | 950.752 | 950.7   | 951.85  | 951.381 | 954.596 | 953.213 |
| R(2)  | 950.949        | 951.231 | 950.925 | 950.873 | 951.988 | 951.52  | 954.709 | 953.329 |
| R(3)  | 951.148        | 951.431 | 951.091 | 951.041 | 952.122 | 951.654 | 954.815 | 953.439 |
| R(4)  | 951.33         | 951.615 | 951.251 | 951.203 | 952.25  | 951.783 | 954.914 | 953.543 |
| R(5)  | 951.496        | 951.782 | 951.404 | 951.359 | 952.372 | 951.908 | 955.006 | 953.642 |
| R(6)  | 951.648        | 951.935 | 951.551 | 951.51  | 952.49  | 952.028 | 955.091 | 953.735 |
| R(7)  | <b>951.783</b> | 952.072 | 951.691 | 951.654 | 952.602 | 952.142 | 955.17  | 953.823 |
| R(8)  | 951.905        | -       | 951.825 | -       | 952.708 | -       | 955.242 | -       |
| R(9)  | 952.012        | -       | 951.952 | -       | 952.81  | -       | 955.309 | -       |
| R(10) | 952.106        | -       | 952.073 | -       | 952.906 | -       | 955.369 | -       |
| R(11) | 952.187        | -       | 952.188 | -       | 952.997 | -       | 955.424 | -       |
| R(12) | 952.255        | -       | 952.297 | -       | 953.083 | -       | 955.474 | -       |
| R(13) | 952.31         | -       | 952.399 | -       | 953.164 | -       | 955.519 | -       |
| R(14) | -              | -       | 952.496 | -       | 953.241 | -       | 955.558 | -       |
| R(15) | -              | -       | 952.586 | -       | 953.312 | -       | 955.593 | -       |
| R(16) | -              | -       | 952.67  | -       | 953.379 | -       | 955.624 | -       |
| R(17) | -              | -       | 952.749 | -       | 953.441 | -       | 955.65  | -       |
| R(18) | -              | -       | 952.821 | -       | 953.499 | -       | 955.672 | -       |
| R(19) | -              | -       | 952.888 | -       | 953.552 | -       | 955.689 | -       |
| R(20) | -              | -       | 952.949 | -       | 953.601 | -       | 955.703 | -       |
| R(21) | -              | -       | 953.005 | -       | 953.645 | -       | 955.713 | -       |
| R(22) | -              | -       | 953.055 | -       | -       | -       | 955.72  | -       |
| R(23) | -              | -       | 953.1   | -       | -       | -       | 955.723 | -       |

---

| Transition | NH <sub>3</sub> -Ne |                  | NH <sub>3</sub> -Ar<br>$\Sigma_i(j=1,k=0) \leftarrow \Sigma_i(j=0,k=0)$ |                  | NH <sub>3</sub> -Kr |                  | NH <sub>3</sub> -Xe |                  |
|------------|---------------------|------------------|-------------------------------------------------------------------------|------------------|---------------------|------------------|---------------------|------------------|
|            | Exp                 | <i>Ab initio</i> | Exp                                                                     | <i>Ab initio</i> | Exp                 | <i>Ab initio</i> | Exp                 | <i>Ab initio</i> |
| P(1)       | 956.981             | 957.325          | 960.541                                                                 | 961.278          | 959.981             | 960.216          | -                   | 958.877          |
| P(2)       | 956.723             | 957.065          | 960.353                                                                 | 961.089          | 959.829             | 960.065          | -                   | 958.748          |
| P(3)       | 956.472             | 956.811          | 960.167                                                                 | 960.903          | 959.680             | 959.917          | -                   | 958.622          |
| P(4)       | 956.227             | 956.562          | 959.984                                                                 | 960.719          | 959.534             | 959.771          | -                   | 958.500          |
| P(5)       | 955.989             | 956.317          | 959.805                                                                 | 960.537          | 959.391             | 959.627          | -                   | 958.381          |
| P(6)       | 955.756             | 956.078          | 959.629                                                                 | 960.358          | 959.252             | 959.486          | -                   | 958.265          |
| P(7)       | 955.529             | 955.842          | 959.457                                                                 | 960.181          | 959.115             | 959.347          | -                   | 958.152          |
| P(8)       | 955.306             | 955.610          | 959.287                                                                 | 960.006          | 958.981             | 959.211          | -                   | 958.043          |
| P(9)       | 955.086             | -                | 959.121                                                                 | -                | 958.850             | -                | -                   | -                |
| P(10)      | 954.869             | -                | 958.957                                                                 | -                | 958.722             | -                | -                   | -                |
| P(11)      | 954.653             | -                | -                                                                       | -                | 958.597             | -                | -                   | -                |
| P(12)      | 954.436             | -                | -                                                                       | -                | 958.474             | -                | -                   | -                |
| P(13)      | 954.217             | -                | -                                                                       | -                | 958.354             | -                | -                   | -                |
| P(14)      | -                   | -                | -                                                                       | -                | 958.236             | -                | -                   | -                |
| P(15)      | -                   | -                | -                                                                       | -                | 958.121             | -                | -                   | -                |
| P(16)      | -                   | -                | -                                                                       | -                | 958.009             | -                | -                   | -                |
| P(17)      | -                   | -                | -                                                                       | -                | 957.898             | -                | -                   | -                |
| P(18)      | -                   | -                | -                                                                       | -                | 957.791             | -                | -                   | -                |
| R(0)       | <b>957.516</b>      | 957.858          | 960.928                                                                 | 961.661          | 960.293             | 960.525          | -                   | 959.145          |
| R(1)       | <b>957.792</b>      | 958.132          | 961.126                                                                 | 961.856          | 960.454             | 960.683          | -                   | 959.285          |
| R(2)       | <b>958.073</b>      | 958.408          | 961.327                                                                 | 962.052          | 960.618             | 960.843          | -                   | 959.427          |
| R(3)       | <b>958.358</b>      | 958.686          | 961.530                                                                 | 962.251          | 960.784             | 961.005          | -                   | 959.573          |
| R(4)       | <b>958.645</b>      | 958.965          | 961.736                                                                 | 962.450          | <b>960.953</b>      | 961.169          | -                   | 959.721          |
| R(5)       | <b>958.934</b>      | 959.243          | 961.945                                                                 | 962.652          | <b>961.125</b>      | 961.336          | -                   | 959.873          |
| R(6)       | <b>959.223</b>      | 959.518          | 962.156                                                                 | 962.854          | <b>961.299</b>      | 961.504          | -                   | 960.028          |
| R(7)       | <b>959.510</b>      | 959.789          | 962.368                                                                 | 963.058          | <b>961.475</b>      | 961.674          | -                   | 960.185          |
| R(8)       | -                   | -                | 962.583                                                                 | -                | -                   | -                | -                   | -                |
| R(9)       | -                   | -                | 962.799                                                                 | -                | -                   | -                | -                   | -                |

Table S2 : List of observed  $\Sigma_f(j=1, k=0) \leftarrow \Sigma_i(j=0, k=0)$  ortho transitions ( $\text{cm}^{-1}$ ) for the three less abundant  $\text{NH}_3\text{-Kr}$  isotopomers with  $^{82}\text{Kr}$ ,  $^{83}\text{Kr}$  and  $^{86}\text{Kr}$ .

| Transition | $\text{NH}_3\text{-}^{82}\text{Kr}$                 | $\text{NH}_3\text{-}^{83}\text{Kr}$ | $\text{NH}_3\text{-}^{86}\text{Kr}$ |
|------------|-----------------------------------------------------|-------------------------------------|-------------------------------------|
|            | $\Pi_{e/f}(j=1, k=0) \leftarrow \Sigma_i(j=1, k=0)$ |                                     |                                     |
| P(1)       | -                                                   | -                                   | -                                   |
| P(2)       | -                                                   | -                                   | -                                   |
| P(3)       | -                                                   | -                                   | 951.0779                            |
| P(4)       | 950.9024                                            | -                                   | 950.9079                            |
| P(5)       | 950.7261                                            | 950.7281                            | 950.7329                            |
| P(6)       | 950.5444                                            | 950.5468                            | 950.5528                            |
| P(7)       | 950.3581                                            | 950.3606                            | 950.3678                            |
| P(8)       | 950.1662                                            | 950.1689                            | 950.1777                            |
| P(9)       | 949.9693                                            | 949.9735                            | -                                   |
| P(10)      | 949.7685                                            | 949.7730                            | 949.7840                            |
| P(11)      | 949.5628                                            | 949.5672                            | 949.5801                            |
| P(12)      | -                                                   | 949.3577                            | 949.3720                            |
| P(13)      | -                                                   | 949.1444                            | 949.1602                            |
| P(14)      | -                                                   | 948.9270                            | 948.9440                            |
| P(15)      | -                                                   | -                                   | -                                   |
| P(16)      | -                                                   | -                                   | -                                   |
| P(17)      | -                                                   | -                                   | -                                   |
| P(18)      | -                                                   | -                                   | -                                   |
| Q(1)       | 951.5557                                            | 951.5557                            | 951.5557                            |
| Q(2)       | 951.5538                                            | 951.5538                            | 951.5538                            |
| Q(3)       | 951.5510                                            | 951.5510                            | 951.5510                            |
| Q(4)       | 951.5472                                            | 951.5472                            | 951.5472                            |
| Q(5)       | 951.5424                                            | 951.5424                            | 951.5424                            |
| Q(6)       | 951.5368                                            | 951.5368                            | 951.5368                            |
| Q(7)       | 951.5304                                            | 951.5304                            | 951.5304                            |
| Q(8)       | 951.5231                                            | 951.5231                            | 951.5231                            |
| Q(9)       | 951.5147                                            | 951.5147                            | 951.5147                            |
| Q(10)      | 951.5055                                            | 951.5055                            | 951.5055                            |
| Q(11)      | 951.4955                                            | 951.4955                            | 951.4955                            |
| Q(12)      | 951.4846                                            | 951.4846                            | 951.4846                            |
| Q(13)      | 951.4729                                            | 951.4729                            | 951.4729                            |
| Q(14)      | 951.4603                                            | 951.4603                            | 951.4603                            |
| Q(15)      | 951.4470                                            | 951.4470                            | 951.4470                            |
| Q(16)      | 951.4329                                            | 951.4329                            | 951.4329                            |
| Q(17)      | 951.4181                                            | 951.4181                            | 951.4181                            |
| Q(18)      | 951.4026                                            | 951.4026                            | 951.4026                            |
| Q(19)      | 951.3865                                            | 951.3865                            | 951.3865                            |
| Q(20)      | 951.3697                                            | 951.3697                            | 951.3697                            |
| Q(21)      | 951.3524                                            | 951.3524                            | 951.3524                            |
| Q(22)      | 951.3343                                            | 951.3343                            | 951.3343                            |
| Q(23)      | 951.3157                                            | 951.3157                            | 951.3157                            |
| Q(24)      | 951.2969                                            | 951.2969                            | 951.2969                            |
| Q(25)      | 951.2774                                            | 951.2774                            | 951.2774                            |
| Q(26)      | 951.2584                                            | 951.2584                            | 951.2584                            |

---

|       |          |          |          |
|-------|----------|----------|----------|
| Q(27) | 951.2384 | 951.2384 | 951.2384 |
| Q(28) | 951.2177 | 951.2177 | 951.2177 |
| R(2)  | -        | -        | 951.9873 |
| R(3)  | 952.1244 | -        | 952.1203 |
| R(4)  | 952.2523 | -        | 952.2479 |
| R(5)  | 952.3756 | -        | 952.3699 |
| R(6)  | 952.4936 | -        | 952.4869 |
| R(7)  | 952.6057 | 952.6035 | 952.5985 |
| R(8)  | 952.7127 | -        | 952.7050 |
| R(9)  | 952.8142 | -        | 952.8060 |
| R(10) | 952.9107 | -        | 952.9023 |
| R(11) | 953.0019 | 952.9996 | 952.9927 |
| R(12) | 953.0883 | 953.0862 | 953.0791 |
| R(13) | 953.1694 | -        | 953.1598 |
| R(14) | 953.2461 | -        | 953.2364 |
| R(15) | 953.3182 | 953.3153 | 953.3081 |
| R(16) | 953.3843 | -        | 953.3745 |
| R(17) | 953.4470 | -        | 953.4365 |
| R(18) | 953.5045 | -        | 953.4946 |
| R(19) | -        | -        | 953.5482 |
| R(20) | -        | -        | 953.5965 |

---

Table S3: Spectroscopic constants (MHz) of the  $\Pi_{e/f}(j=1, k=0)$  state of the three minor  $\text{NH}_3\text{-Kr}$  isotopomers derived from rovibrational band contour simulations. Molecular parameters are derived using the expressions of the pseudodiatomic model. Ground state constants are given in [1]. The ground state constants of  $\text{NH}_3\text{-}^{83}\text{Kr}$  (in italics) have been extrapolated from those of other Kr isotopes.

|                         | $^{82}\text{Kr}$ | $^{83}\text{Kr}$ | $^{84}\text{Kr}$ | $^{86}\text{Kr}$ |
|-------------------------|------------------|------------------|------------------|------------------|
| $\Sigma_f (j=0, k=0)$   |                  |                  |                  |                  |
| $B''$                   | 2330.5543(1)     | <i>2325.5</i>    | 2321.1770(1)     | 2312.2304(1)     |
| $D_J''$                 | 0.0457(1)        | <i>0.0455</i>    | 0.0454(1)        | 0.0450(1)        |
| $\Pi_{e/f} (j=1, k=0)$  |                  |                  |                  |                  |
| $\nu_0(\text{cm}^{-1})$ | 951.55656(8)     | 951.55665(9)     | 951.55658(6)     | 951.55655(6)     |
| $B$                     | 2283.052(51)     | 2277.989(77)     | 2273.984(33)     | 2265.304(36)     |
| $B_{\text{eff}}$        | 2316.43(12)      | 2311.34(19)      | 2307.048(76)     | 2298.11(8)       |
| $D_J$                   | 0.03766(31)      | 0.03632(70)      | 0.03765(14)      | 0.03731(19)      |
| $D_{J,\text{eff}}$      | 0.05047(36)      | 0.05122(83)      | 0.04985(34)      | 0.04954(22)      |
| $H_J(10^6)$             | -2.08(5)         | -4(1)            | -1.69(18)        | -1.69(27)        |
| $q$                     | 66.806(66)       | 66.76(11)        | 66.177(43)       | 65.657(47)       |
| $q_D$                   | -0.01281(5)      | -0.0149(13)      | -0.0122(2)       | -0.01213(3)      |
| $q_H(10^6)$             | 5.0(1)           | 9(3)             | 4.2(3)           | 4.2(3)           |
| $R(\text{\AA})$         | 3.9344(1)        | 3.9347(2)        | 3.93434(6)       | 3.93426(7)       |
| $\nu_s(\text{cm}^{-1})$ | 33.1(1)          | 32.8(3)          | 33.1(1)          | 33.0(1)          |
| # lines                 | 52               | 42               | 65               | 58               |
| RMS                     | 6.2              | 6.3              | 6.3              | 5.6              |

|   | NH <sub>3</sub> -Ne |                  | NH <sub>3</sub> -Ar |                  | NH <sub>3</sub> -Kr |                  | NH <sub>3</sub> -Xe |                  |
|---|---------------------|------------------|---------------------|------------------|---------------------|------------------|---------------------|------------------|
| J | Exp                 | <i>Ab initio</i> |
| 1 | 284.87              | 278.66           | 97.16               | 85.44            | 61.48               | 62.20            | 83.47               | 66.10            |
| 2 | 284.91              | 278.05           | 91.44               | 85.39            | 65.99               | 62.15            | 85.65               | 65.95            |
| 3 | 284.94              | 276.93           | 91.71               | 85.36            | 66.37               | 62.13            | 82.99               | 65.85            |
| 4 | 284.95              | 275.52           | 91.66               | 85.29            | 65.99               | 62.05            | 83.79               | 65.66            |
| 5 | 284.96              | 273.80           | 92.39               | 85.21            | 66.33               | 61.97            | 82.82               | 65.43            |
| 6 | 283.12              | 271.78           | 92.05               | 85.10            | 65.63               | 61.87            | 82.01               | 65.16            |
| 7 | 283.09              | 269.53           | 92.26               | 84.98            | 66.00               | 61.75            | 81.34               | 64.85            |
| 8 | 282.01              | 267.04           | 92.33               | 84.84            | 66.44               | 61.61            | 80.77               | 64.50            |

Table S4: Energy difference between the *e* and *f* components of the  $\Pi_{e/f}$  ( $j=1, k=0$ ) state for  $J = 1-8$  derived from the *ab initio* calculated VRT states (noted *Ab initio*) compared to the *K*-type doubling constant  $q$  extracted from the simplified expression of the rotational energy in Eqn (4) (noted Exp.)
